# Supplementary material for: Patients’ Experiences of a Sarcoma Diagnosis: A Process Mapping Exercise of Diagnostic Pathways
Source: MDPI journal article supplement (doi:10.3390/cancers15153946), 2023-08-03
Supplement: s1 [file s1]

## Supplementary Material

### File S1 – Details of patients who were confirmed as being misdiagnosed

| ID          | Gender | Age group | Symptom (body location)       | Recurrence | Details                                   | Time from symptom onset to diagnosis in days |
|-------------|--------|-----------|-------------------------------|------------|-------------------------------------------|----------------------------------------------|
| Bone        | Female | 25-39     | Pain (thigh)                  | No         | GP refused MRI, (patient went private)    | 96                                           |
| Bone        | Female | 40-64     | Pain (knee)                   | No         | Assumed a broken bone                     | 109                                          |
| Bone        | Male   | 25-39     | Pain (knee)                   | No         | Referred/provided physiotherapy           | 451                                          |
| Bone        | Male   | 65+       | Lump (hip)                    | No         | Referred/provided physiotherapy           | 464                                          |
| Bone        | Male   | 40-64     | Pain (knee)                   | No         | Prescribed pain killers                   | 492                                          |
| Bone        | Male   | 65+       | Pain (knee)                   | No         | Assumed loose ligaments & fracture        | 673                                          |
| Bone        | Male   | 25-39     | Pain (shoulder)               | No         | Assumed tendonitis                        | 803                                          |
| Soft tissue | Female | 25-39     | Bruise & body changes         | No         | Assumed a benign tumour                   | 133                                          |
| Soft tissue | Female | 13-24     | Pain (gynaecological and leg) | No         | Received negative tumour markers          | 243                                          |
| Soft tissue | Male   | 65+       | Pain (back)                   | No         | Assumed was lipoma                        | 244                                          |
| Soft tissue | Female | 40-64     | Lump (shin)                   | No         | Did not advise MRI                        | 267                                          |
| Soft tissue | Female | 40-64     | Ill health                    | Yes        | Assumed fibroids and advised hysterectomy | 329                                          |
| Soft tissue | Female | 25-39     | Pain (lower back)             | Yes        | Assumed growing pains                     | 768                                          |
| Soft tissue | Male   | 40-64     | Pain (shoulder)               | No         | Assumed scar tissue                       | 904                                          |
| Soft tissue | Female | 65+       | Lump (chest)                  | No         | Assumed fatty lump and advised ibuprofen  | 1,166                                        |

|               |        |       |                       |     |                                                     |       |
|---------------|--------|-------|-----------------------|-----|-----------------------------------------------------|-------|
| Soft tissue   | Female | 25-39 | Lump (cyst)           | No  | Assumed cyst                                        | 1,277 |
| Soft tissue   | Female | 25-39 | Not mentioned         | Yes | Unsure if rectus sheath hematoma was a misdiagnosis | 505   |
| Head and neck | Male   | 40-64 | Tingling (lip)        | Yes | Assumed chondrosarcoma                              | 32    |
| Head and neck | Female | 25-39 | Lump (gum)            | No  | Pathology not done on lump                          | 142   |
| Head and neck | Female | 40-64 | Lump/tumour (jawbone) | No  | Initially thought non-malignant                     | 2,679 |
| GIST          | Male   | 40-64 | Large swelling        | No  | Large swelling assumed a hernia                     | 4     |
| GIST          | Male   | 40-64 | Reflux/stomach issues | No  | Prescribed treatment for reflux                     | 5,479 |

GP: General Practitioner; MRI: Magnetic Resonance Imaging; GIST: Gastro-intestinal imaging
